# Supplementary material for: Complete Procedure for Fabrication of a Fused Silica Ultrarapid Microfluidic Mixer Used in Biophysical Measurements
Source: MDPI journal article supplement (doi:10.3390/mi8010016), 2017-01-07
Supplement: s1 [file s1]

# Supplementary Materials: Complete Procedure for Fabrication of a Fused Silica Ultrarapid Microfluidic Mixer Used in Biophysical Measurements

Dena Izadi, Trieu Nguyen and Lisa Lapidus

## Deep Etching Fused Silica with KMPR 1010

Figure S1 shows the SEM image of uniform KMPR 1010 layer after developing. The thickness of this layer is  $\sim 17\text{ }\mu\text{m}$  measured using a Dektak 8M Surface Profilometer (Bruker Corporation, Billerica, MA, USA) (see Table S1). Figure S2 shows the SEM of the etched fused silica channel after removing KMPR 1010. The depth of this channel is  $\sim 45\text{ }\mu\text{m}$  as measured by the Dektak 8M Surface Profilometer.

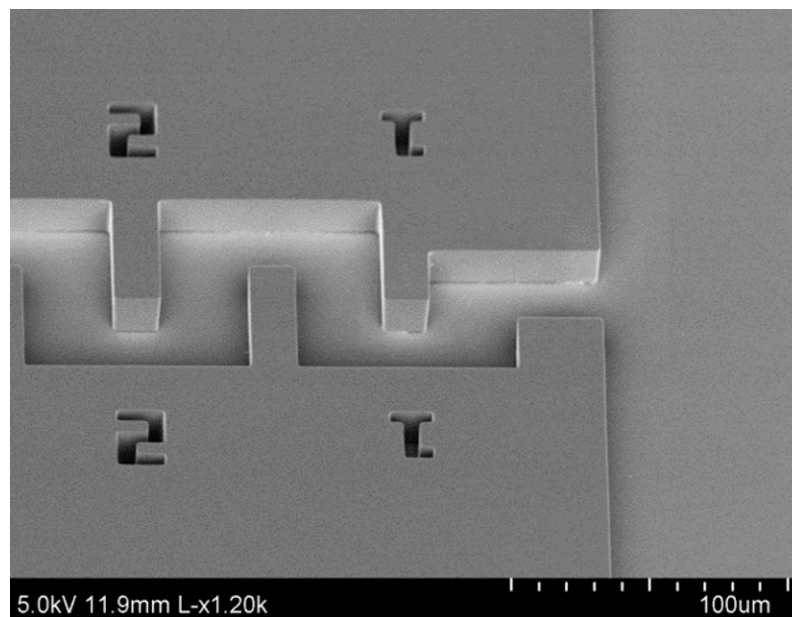

**Figure S1.** SEM image of KMPR 1010 layer after developing on the fused silica.

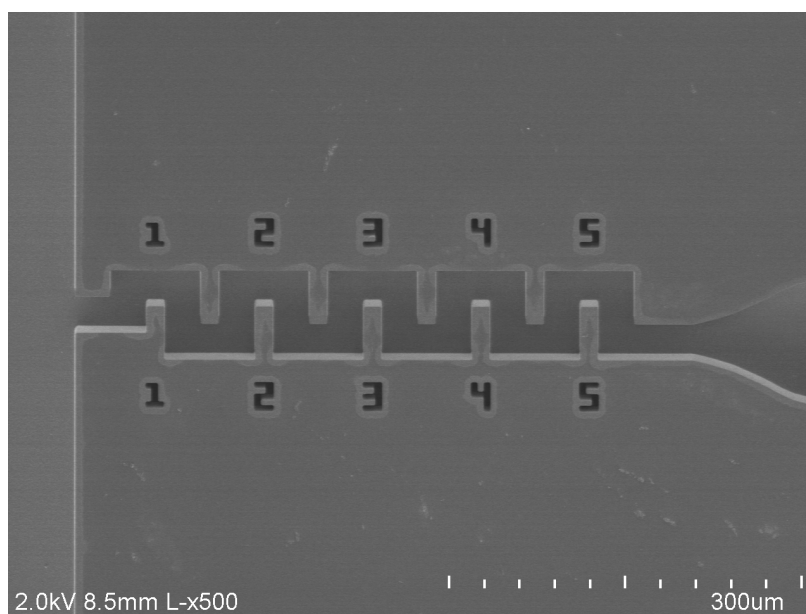

**Figure S2.** SEM image of etched fused silica channels after removing KMPR 1010.

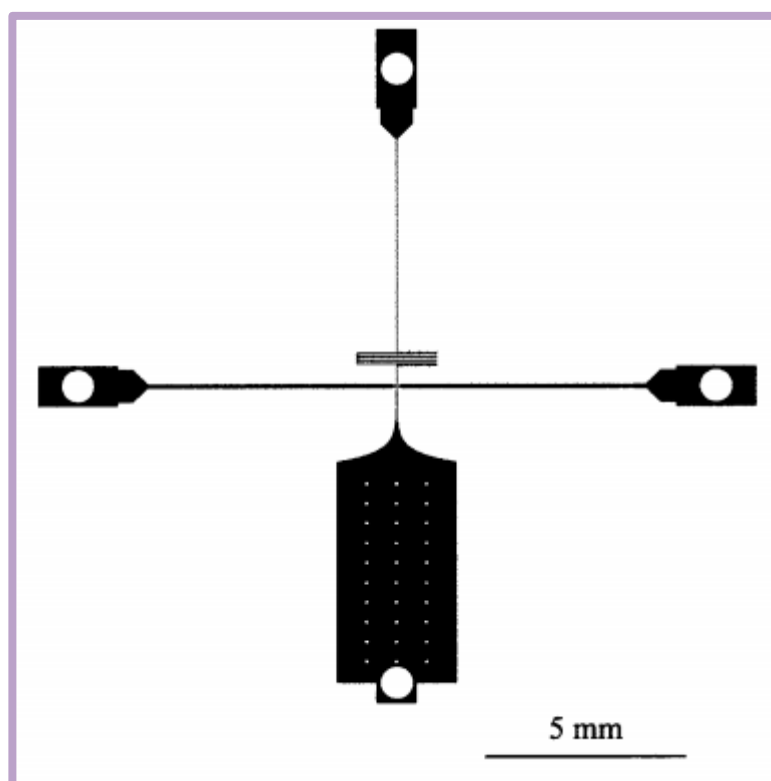

**Figure S3.** Layout of individual chip [1].

**Table S1.** Fabrication process for KMPR1010.

| Process Parameter        | Process Tool                   | Serpentine Mixer Design |
|--------------------------|--------------------------------|-------------------------|
| Photoresist              | ACS 200 Cluster                | KMPR® 1010              |
| Photoresist spin speed   | ACS 200 Cluster                | 1500 RPM                |
| Average resist Thickness | Dektak 8M Surface Profilometer | 17.0 $\mu\text{m}$      |
| UV exposure time         | Karl Suss MA6                  | 18.0 s                  |
| Development time         | AZ 300 MIF                     | 285 s                   |
| Total etch time          | STS glass etcher               | 90 min                  |
| Etched channel depth     | Dektak 8M                      | 45.0 $\mu\text{m}$      |

## Reference

1. Waldauer, S.A. Early Events in Protein Folding Investigated through Ultrarapid Microfluidic Mixing. Ph.D. Thesis, Michigan State University, East Lansing, MI, USA, 2010.

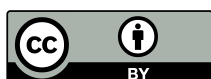

© 2017 by the authors. Submitted for possible open access publication under the terms and conditions of the Creative Commons Attribution (CC-BY) license (<http://creativecommons.org/licenses/by/4.0/>).
